# Supplementary material for: Targeting of mutant p53-induced FoxM1 with thiostrepton induces cytotoxicity and enhances carboplatin sensitivity in cancer cells
Source: PubMed Central journal article supplement (PMC4294351; doi:10.18632/oncotarget.2497), 2014-12-04
Supplement: oncotarget-05-11365-s001.pdf [file oncotarget-05-11365-s001.pdf]

SUPPLEMENTARY FIGURES AND TABLES

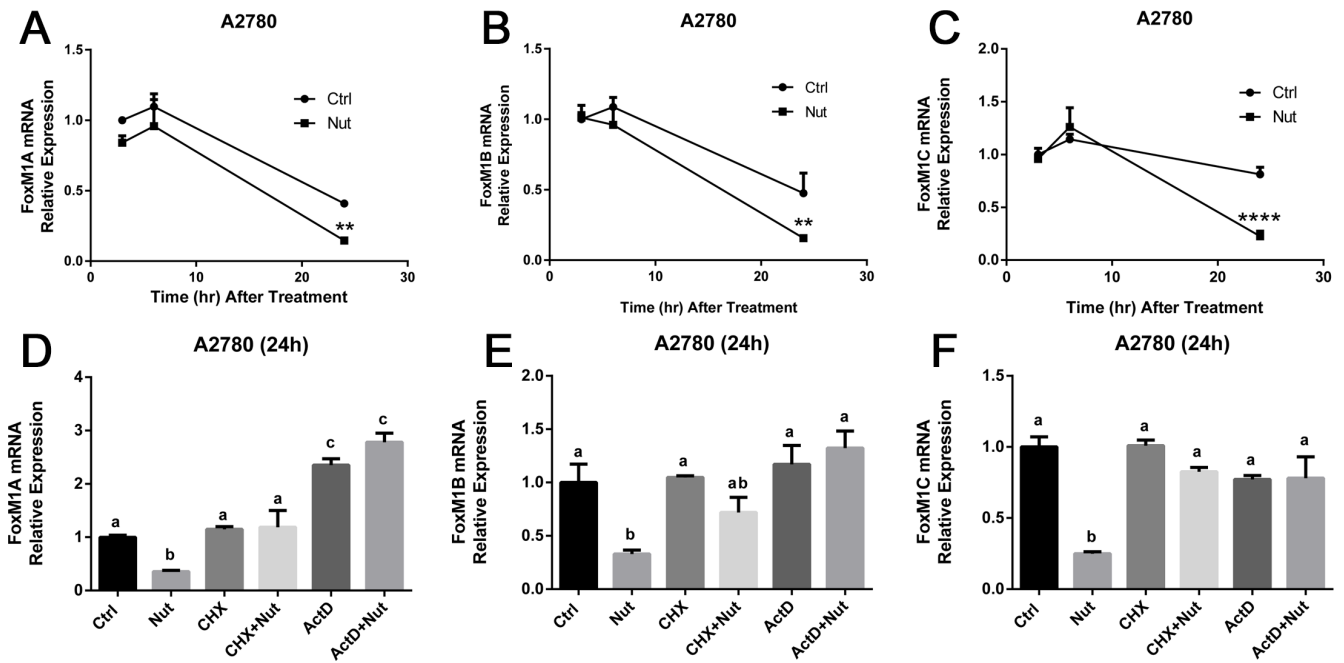

**Supplementary Figure S1: Effects of Nutlin-3 on the expression of FoxM1 isoform A, B, and C in A2780 cells.** Upper panel: Cells were treated with vehicle (0.05% DMSO) or 10  $\mu$ M Nutlin-3 for 3, 6 or 24 h. Lower panel: Cells were treated with DMSO, Nutlin-3, CHX, CHX+Nutlin-3, ActD or ActD+Nutlin-3 for 24 h. Total RNA was isolated and subjected to real-time RT-PCR analysis. GAPDH was used for normalization of FoxM1 expression. Data are presented as Mean  $\pm$  SD of 3 experiments. \*\*indicates  $P < 0.01$ , and \*\*\*\* indicates  $P < 0.0001$  by paired t-test. Difference alphabet letters indicate significant differences ( $P < 0.05$ ) across treatments by One-way ANOVA.

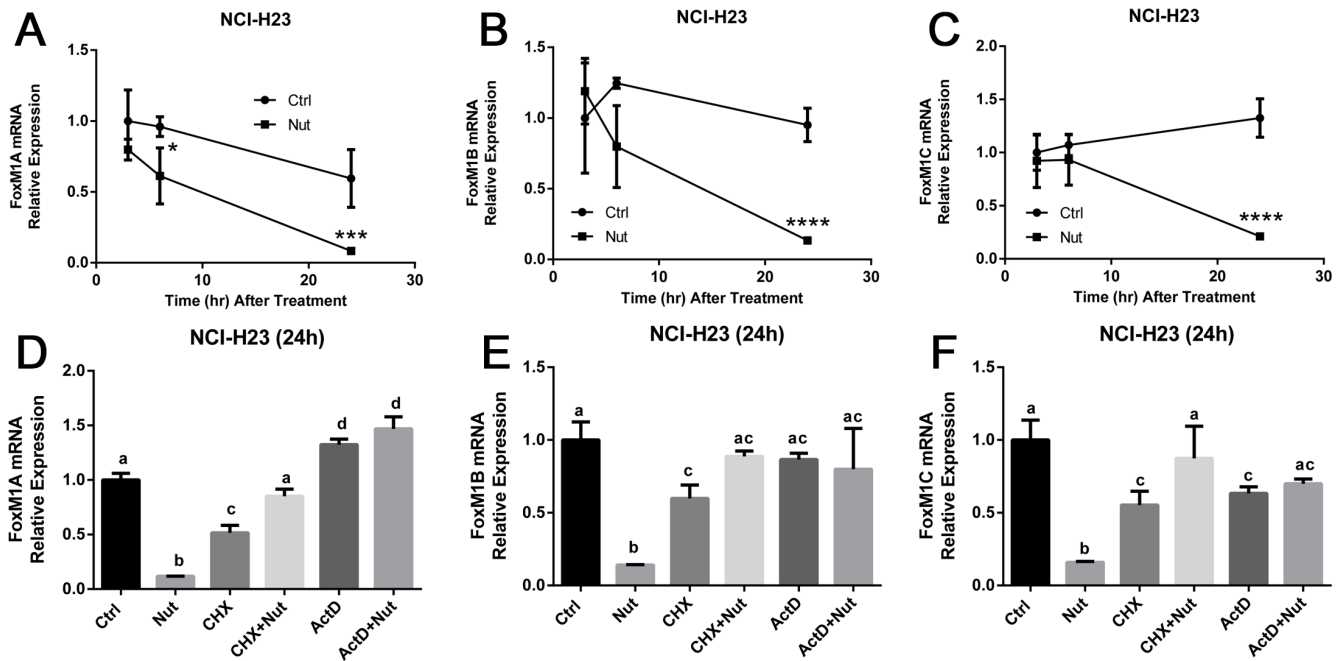

**Supplementary Figure S2: Effects of Nutlin-3 on the expression of FoxM1 isoform A, B, and C in NCI-H23 cells.** Upper panel: Cells were treated with vehicle (0.05% DMSO) or 10  $\mu$ M Nutlin-3 for 3, 6 or 24 h. Lower panel: Cells were treated with DMSO, Nutlin-3, CHX, CHX+Nutlin-3, ActD or ActD+Nutlin-3 for 24 h. Total RNA was isolated and subjected to real-time RT-PCR analysis. GAPDH was used for normalization of FoxM1 expression. Data are presented as Mean  $\pm$  SD of 3 experiments. \*\*\* indicates  $P < 0.001$ , and \*\*\*\* indicates  $P < 0.0001$  by paired t-test. Difference alphabet letters indicate significant differences ( $P < 0.05$ ) across treatments by One-Way ANOVA.

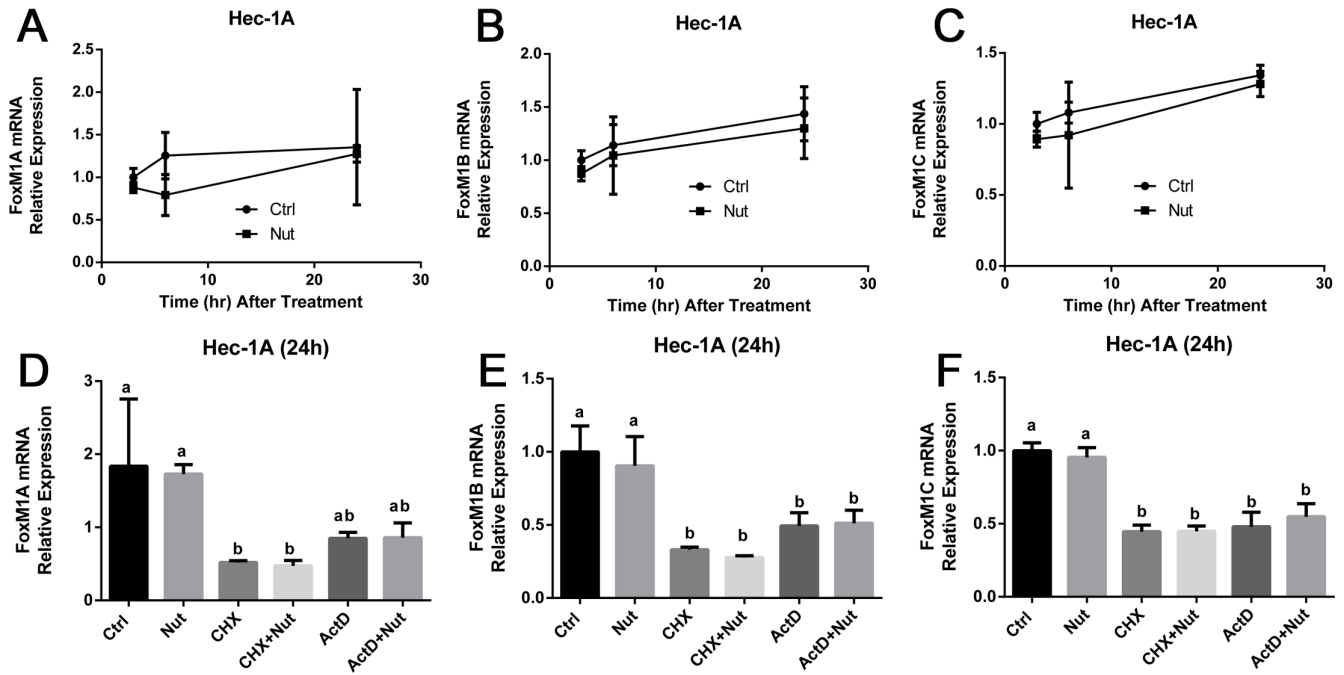

**Supplementary Figure S3: Effects of Nutlin-3 on the expression of FoxM1 isoform A, B, and C in HEC-1A cells.** Upper panel: Cells were treated with vehicle (0.05% DMSO) or 10  $\mu$ M Nutlin-3 for 3, 6 or 24 h. Lower panel: Cells were treated with DMSO, Nutlin-3, CHX, CHX+Nutlin-3, ActD or ActD+Nutlin-3 for 24 h. Total RNA was isolated and subjected to real-time RT-PCR analysis. GAPDH was used for normalization of FoxM1 expression. Data are presented as Mean  $\pm$  SD of 3 experiments. Difference alphabet letters indicate significant differences ( $P < 0.05$ ) across treatments by One-way ANOVA.

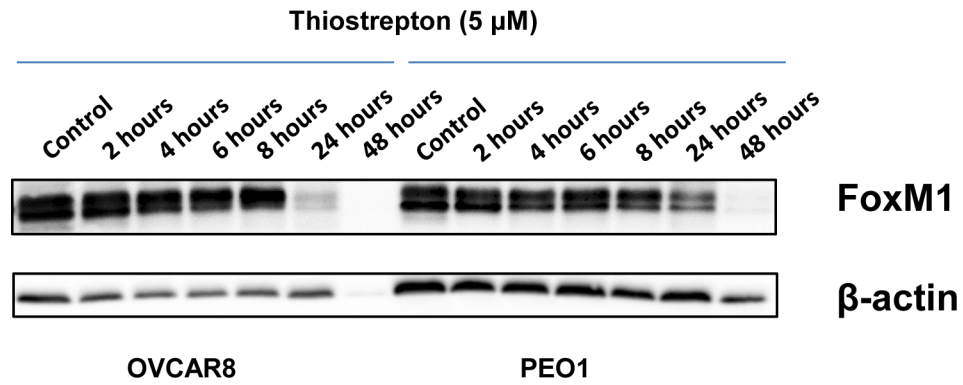

**Supplementary Figure S4: Thiostrepton downregulates FoxM1 expression in OVCAR8 and PEO1.** Cells were treated with 5  $\mu$ M Thiostrepton for indicated time points, and Western blot analysis was performed to determine FoxM1 expression.  $\beta$ -actin was used as the loading control. Down-regulation of  $\beta$ -actin at 48 h reflects proteolysis due to cell death.

A2780

Control

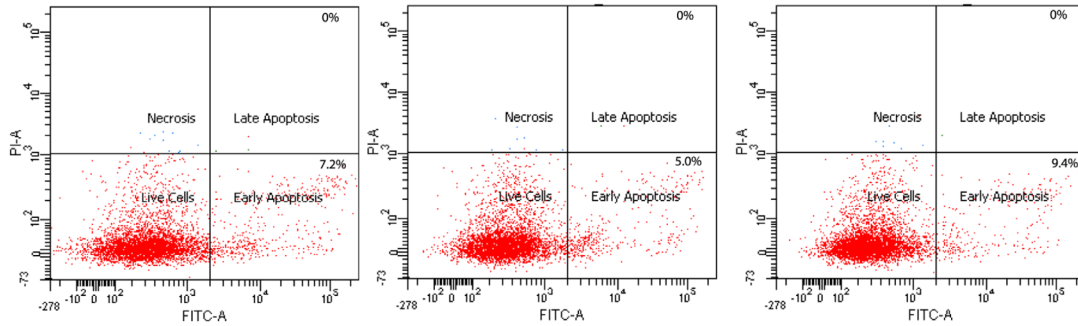

Thiostrepton (5  $\mu$ M)

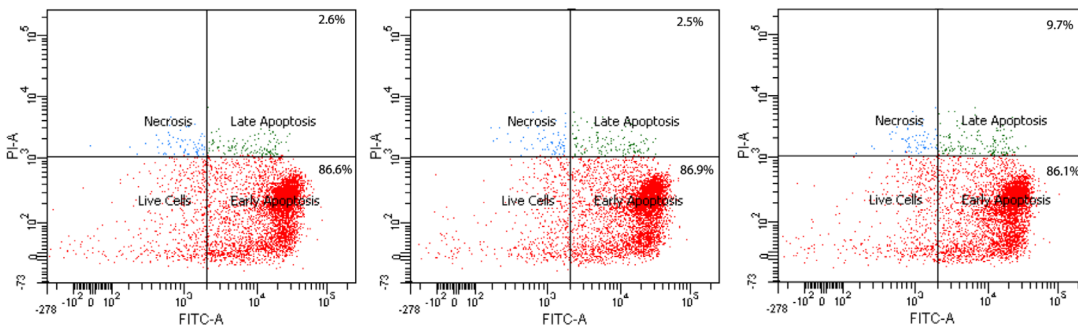

HEC-1A

Control

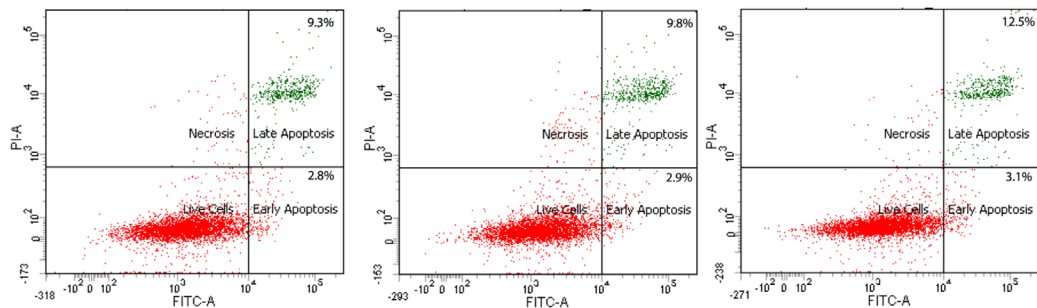

Thiostrepton (10  $\mu$ M)

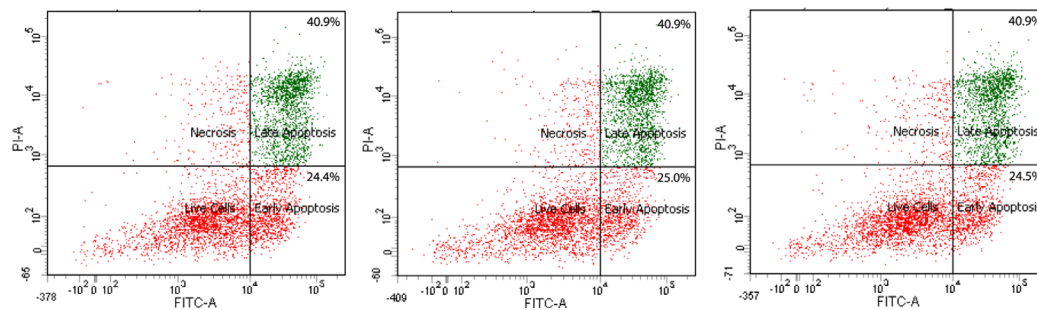

**Supplementary Figure S5: Thiostrepton induces apoptosis in cancer cells.** Cancer cells were treated with 5  $\mu$ M (A2780) or 10  $\mu$ M (HEC-1A) thiostrepton for 48 hours, and floating and attached cells were collected, stained with Annexin V (x-axis, FITC-A) and Propidium Iodide (PI) and sorted by flow cytometry. (A) Upper panels represent three replicates of untreated control cells, and low panels represents three replicates of A2780 cells treated with thiostrepton. Results indicate approximately 86% of cells undergoing early apoptosis compared to approximately 7.2% of cells undergoing early apoptosis in untreated cells. (B) In HEC-1A cells, both early and late apoptotic cells were observed in thiostrepton-treated cells.

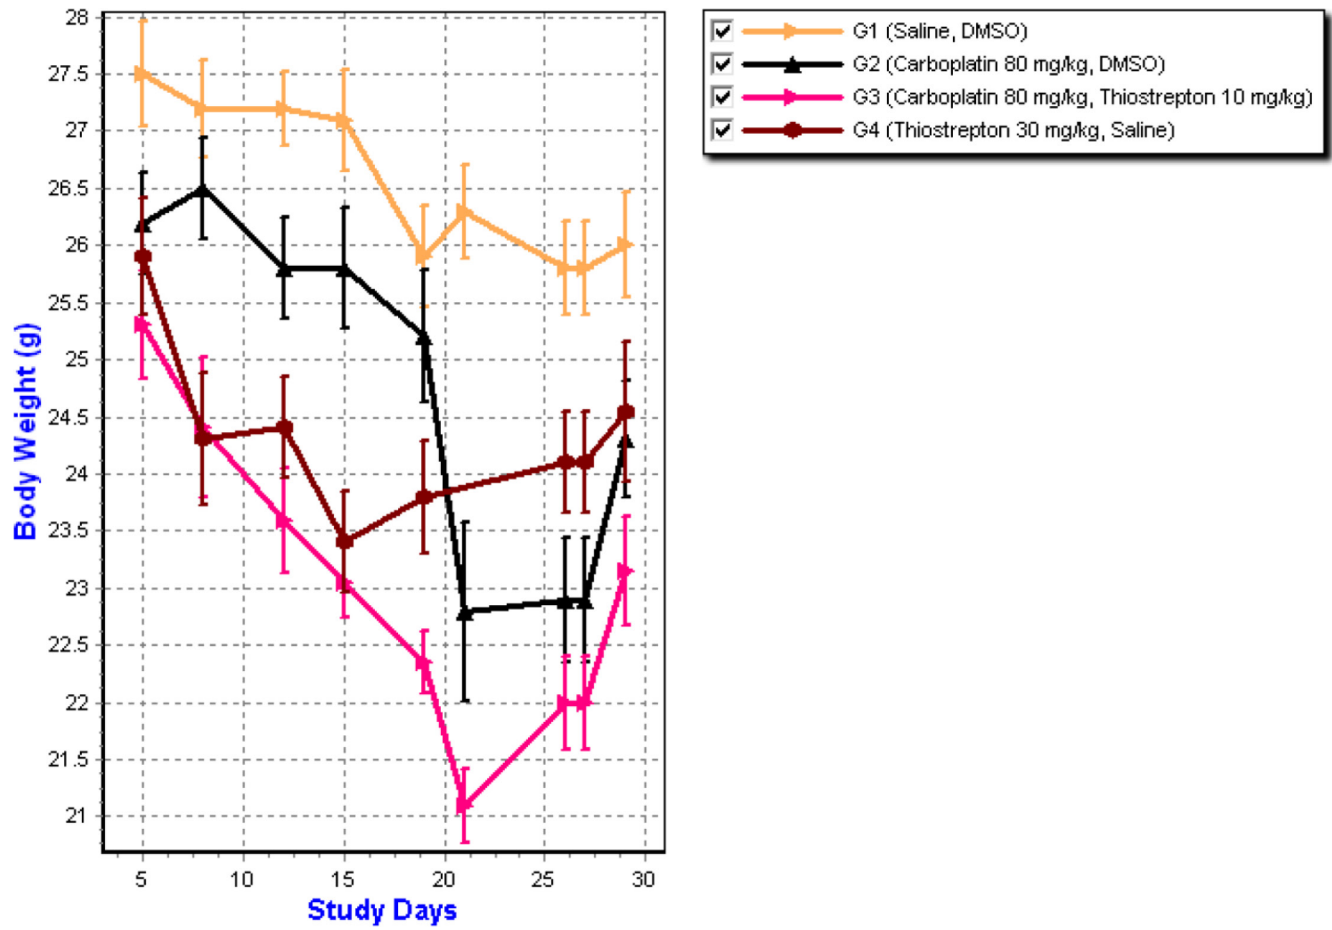

**Supplementary Figure S6: Adverse effect of high dose of carboplatin.** Dramatic weight loss was observed in mice treated with carboplatin alone (black line) or in combination with thioestrepton (red line) by day 21. Therefore, carboplatin dose was lowered to 20 mg/kg in subsequent treatments.

HEC-1A xenograft in DMSO-treated mouse

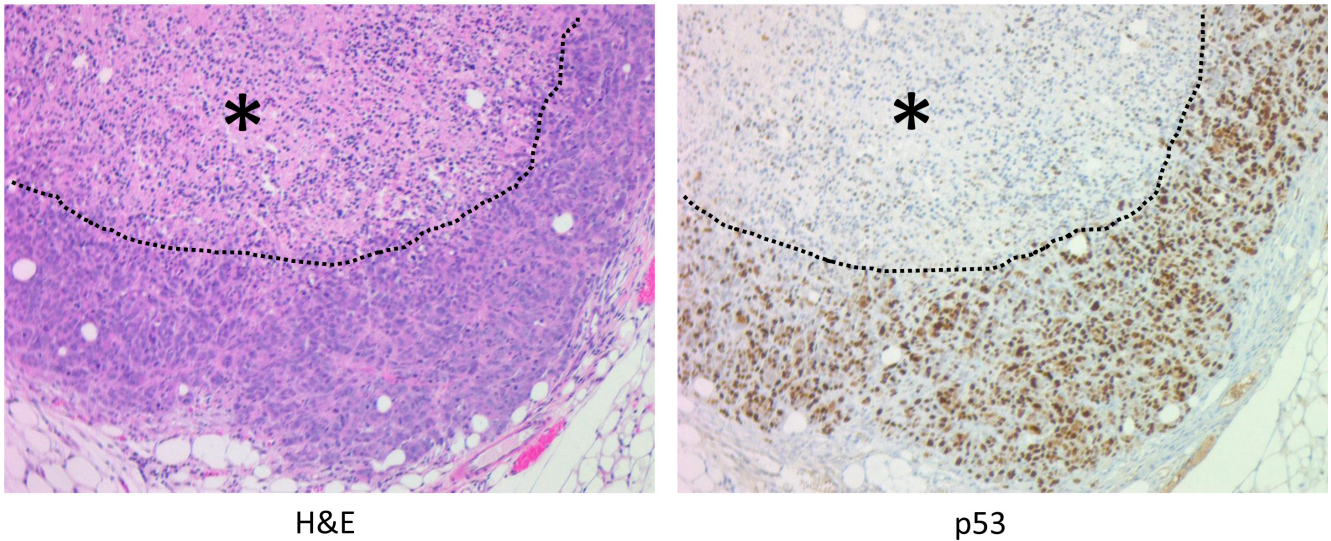

**Supplementary Figure S7: Untreated HEC-1A tumor xenografts show large necrotic regions as indicated by Hematoxylin and Eosin (H&E) staining.** Necrotic region containing pyknotic nuclei is indicated by black demarcation and asterisk. Serial section from the same region was stained with p53 antibody, and tumor cells surrounding the necrotic region show intense staining as expected because HEC-1A cells harbor mutant TP53.

**Supplementary Table S1. Immunohistochemical analysis of FoxM1 expression**

| Patient ID | FoxM1 - Cytoplasmic staining |                     | FoxM1- Nuclear staining |                     | Grade | Histo-Subtype                                                     |
|------------|------------------------------|---------------------|-------------------------|---------------------|-------|-------------------------------------------------------------------|
|            | Intensity Score              | % cells             | Intensity Score         | % cells             |       |                                                                   |
| 1          | 2                            | 100                 | 2                       | 90                  | III   | Serous                                                            |
| 2          | 2                            | 100                 | 2                       | 90                  | III   | Papillary serous                                                  |
| 3          | 3                            | 100                 | 3                       | 85                  | III   | Papillary serous                                                  |
| 4          | 3                            | 100                 | 3                       | 85                  | III   | Papillary serous                                                  |
| 5          | 2                            | 100                 | 2                       | 95                  | III   | NOS - Adenocarcinoma                                              |
| 6          | 3                            | 100                 | 3                       | 95                  | III   | Papillary serous                                                  |
| 7          | 3                            | 100                 | 3                       | 85                  | III   | Papillary serous                                                  |
| 8          | 3                            | 100                 | 3                       | 85                  | II    | Papillary serous                                                  |
| 9          | 3                            | 100                 | 3                       | 85                  |       | Papillary serous                                                  |
| 10         | 2                            | 100                 | 2                       | 85                  | II    | Papillary- mixed serous & mucinous                                |
| 11         | 3                            | 100                 | 3                       | 90                  | III   | Carcinosarcoma                                                    |
| 12         | 3                            | 100                 | 3                       | 90                  | III   | Papillary serous                                                  |
| 13         | 3                            | 100                 | 3                       | 95                  |       | Papillary serous                                                  |
| 14         | 2 to 3                       | 85% - 2,<br>15% - 3 | 3                       | 85% - 2,<br>10% - 3 | III   | Clear cell                                                        |
| 15         | 3                            | 100                 | 3                       | 90                  | III   | Papillary                                                         |
| 16         | 3                            | 100                 | 3                       | 90                  | III   | Serous                                                            |
| 17         | 3                            | 100                 | 3                       | 90                  | III   | Papillary serous                                                  |
| 18         | 3                            | 100                 | 3                       | 80                  | III   | Serous and endometrioid features                                  |
| 19         | 3                            | 100                 | 2                       | 80                  | III   | Papillary, endometrioid, micropapillary, solid and clear patterns |
| 20         | 3                            | 100                 | 3                       | 80                  | III   | Papillary serous                                                  |
| 21         | 3                            | 100                 | 3                       | 70                  | III   | Serous                                                            |
| 22         | 3                            | 100                 | 3                       | 70                  | III   | Papillary serous                                                  |
| 23         | 3                            | 100                 | 3                       | 80                  |       | Papillary serous                                                  |
| 24         | 3                            | 100                 | 3                       | 80                  | III   | Papillary serous                                                  |
| 25         | 3                            | 100                 | 3                       | 80                  | III   | Papillary serous                                                  |
| 26         | 1                            | 100                 | 1                       | 80                  | III   | Papillary serous                                                  |
| 27         | 3                            | 20                  | 3                       | 75                  | III   | Adenocarcinoma, Mixed type not otherwise specified                |
| 28         | 3                            | 100                 | 3                       | 95                  | III   | Serous (partial endometrioid components)                          |
| 29         | 2                            | 100                 | 2                       | 95                  | III   | Mixed carcinoma, serous and transitional                          |

(Continued)



| Patient ID | FoxM1 - Cytoplasmic staining |         | FoxM1- Nuclear staining |                     | Grade | Histo-Subtype                                                                                   |
|------------|------------------------------|---------|-------------------------|---------------------|-------|-------------------------------------------------------------------------------------------------|
|            | Intensity Score              | % cells | Intensity Score         | % cells             |       |                                                                                                 |
| 30         | 3                            | 100     | 3                       | 95                  | III   | Mixed cell type with a predominant endometrioid and focal clear cell and papillary serous types |
| 31         | 3                            | 100     | 3                       | 95                  | III   | Papillary serous with psammoma bodies                                                           |
| 32         | 3                            | 100     | 3                       | 95                  | II    | Cystadenocarcinoma, mixed serous and endometrioid type                                          |
| 33         | 3                            | 100     | 3                       | 95                  | III   | Serous with focal solid areas, endometrioid areas and transitional cell areas                   |
| 34         | 3                            | 95      | 3                       | 80                  | III   | Mixed papillary serous, solid and clear cell                                                    |
| 35         | 3                            | 100     | 3                       | 75                  | III   | Endometrioid carcinoma with focal clear, papillary, serous and squamous differentiation         |
| 36         | 2                            | 100     | 2                       | 75                  | III   | Endometrioid and serous papillary features                                                      |
| 37         | 3                            | 100     | 3                       | 80                  | III   | Primary peritoneal adenocarcinoma, serous type                                                  |
| 38         | 3                            | 100     | 3                       | 90                  | III   | Papillary serous                                                                                |
| 39         | 3                            | 100     | 3                       | 95                  | III   | Serous with psammoma bodies                                                                     |
| 40         | 2                            | 100     | 2 to 3                  | 60% - 2,<br>30% - 3 | III   | Papillary serous                                                                                |
| 41         | 3                            | 100     | 3                       | 90                  | III   | Papillary serous                                                                                |
| 42         | 3                            | 100     | 3                       | 95                  | III   | Papillary serous                                                                                |
| 43         | 3                            | 100     | 3                       | 95                  | III   | Papillary serous                                                                                |
| 44         | 3                            | 100     | 3                       | 80                  | III   | Predominate transitional cell with serous microglandular differentiation                        |
| 45         | 3                            | 100     | 3                       | 95                  | III   | Serous                                                                                          |
| 46         | 3                            | 100     | 3                       | 95                  | III   | Papillary serous                                                                                |
| 47         | 3                            | 100     | 3                       | 95                  | III   | Serous                                                                                          |
| 48         | 2                            | 100     | 2 to 3                  | 60% - 2,<br>30% - 3 | III   | Mixed mucinous and serous                                                                       |
| 49         | 3                            | 100     | 3                       | 95                  | II    | Serous papillary cystadenocarcinoma                                                             |

**Supplementary Table S2. Real-Time RT-PCR primers**

| Gene         | Forward                | Reverse                 |
|--------------|------------------------|-------------------------|
| FoxM1(total) | 5'AGAATTGTCACCTGGAGCAG | 5'TTCCTCTCAGTGCTGTTGATG |
| FoxM1A       | 5'GGTACACCCATCACCAGCTT | 5'ATGGGTCTCGCTAAGTGTTGG |
| FoxM1B       | 5'CGTGGATTGAGGACCACTTT | 5'TCGGTTCGTTTCTGCTGCTT  |
| FoxM1C       | 5'CCCGAGCACTTGGAATCAC  | 5'TCCTCAGCTAGCAGCACCTT  |

**Supplementary Table S3. p53 shRNA and FoxM1 shRNA sequences**

| shRNAs                       | Sequences           |
|------------------------------|---------------------|
| P53 shRNA-1 (V3LHS_333919)   | TACACATGTAGTTGTAGTG |
| P53 shRNA-2 (V3LHS_333920)   | TCTCTTCCTCTGTGCGCCG |
| FoxM1 shRNA-1 (V3LHS_396940) | AATAATCTTGATCCCAGCT |
| FoxM1 shRNA-5 (V2LHS_283849) | ATAATTAGAGGATAATTTG |

Supplementary Table S4. Cell line STR genotypes

| Cell Line | D5S818-Allele 1 | D5S818-Allele 2 | D13S317-Allele 1 | D13S317-Allele 2 | D7S820-Allele 1 | D7S820-Allele 2 | D16S539-Allele 1 | D16S539-Allele 2 | D16S539-Allele 3 | VWA-Allele 1 | VWA-Allele 2 | TH01-Allele 1 | TH01-Allele 2 | TPOX-Allele 1 | TPOX-Allele 2 | CSF1PO-Allele 1 | CSF1PO-Allele 2 | D18S51-Allel 1 | D18S51-Allel 2 | D21S11-Allele 1 | D21S11-Allele 2 | D3S1358-Allele 1 | D3S1358-Allele 2 | D8S1179-Allele 1 | D8S1179-Allele 2 | FGA-Allele 1 | FGA-Allele 2 | Penta_D-Allele 1 | Penta_D-Allele 2 | Penta_E-Allele 1 | Penta_E-Allele 2 | AMEL |   |
|-----------|-----------------|-----------------|------------------|------------------|-----------------|-----------------|------------------|------------------|------------------|--------------|--------------|---------------|---------------|---------------|---------------|-----------------|-----------------|----------------|----------------|-----------------|-----------------|------------------|------------------|------------------|------------------|--------------|--------------|------------------|------------------|------------------|------------------|------|---|
| A2780     | 10              | 13              | 12               | 13               | 10              | 10              | 15               | 16               | 6                | 8            | 10           | 10            | 10            | 10            | 10            | 16              | 17              | 16             | 17             | 28              | 30              | 14               | 17               | 15               | 17               | 18           | 25           | 8                | 10               | 10               | X                |      |   |
| NCI-H23   | 10              | 13              | 12               | 13               | 10              | 10              | 15               | 16               | 6                | 8            | 10           | 10            | 10            | 10            | 10            | 16              | 18              | 18             | 28             | 30              | 14              | 16               | 16               | 16               | 15               | 17           | 19           | 23               | 8                | 9                | 10               | 13   | X |
| HEC-1A    | 11              |                 | 11               |                  | 9               | 11              | 19               | 20               | 6                | 7            | 8            | 11            | 10            |               |               |                 |                 |                | NA             |                 |                 |                  |                  |                  |                  |              |              |                  |                  |                  |                  | X    |   |
| ES2       | 11              | 13              | 11               | 11               | 11              | 11              | 16               | 17               | 9.3              | 8            | 12           | 10            | 15            | 13            | 16            | 16              | 17              | 16             | 32.2           | 33.2            | 15              | 18               | 14               | 14               | 14               | 21           | 8            | 13               | 13               | 16               | X                |      |   |
| SKOV3     | 11              |                 | 8                | 11               | 14              | 14              | 17               | 17               | 9                | 9.3          | 11           | 11            | 11            | 11            | 11            | 16              | 17              | 31             | 31.2           | 14              | 14              | 14               | 14               | 15               | 24               | 25           | 12           | 13               | 5                | 13               | X                |      |   |
| PE01      | 11              | 12              | 10               |                  | 10              |                 | 15               | 16               | 9.3              | 9            | 11           | 10            | 12            | 16            | 17            | 16              | 17              | 32.2           |                |                 | 16              |                  |                  | 13               | 13               | 20           |              | 14               | 12               |                  | X                |      |   |
| OVCAR8    | 11              | 13              | 10               | 10               | 10              | 10              | 16               |                  | 7                | 8            | 11           | 10            | 10            | 12            | 12            | 12              |                 | 31             |                |                 | 16              | 16               | 14               | 14               | 23               | 23           | 12           | 9                | 16               | X                |                  |      |   |
